# Supplementary material
Source: PubMed Central journal article supplement (PMC2593924)
Supplement: rspb20080276s11.pdf [file rspb20080276s11.pdf]

Supplementary material for the paper "Population viscosity can promote the evolution of altruistic sterile helpers and eusociality": evaluation of the invasion conditions

**Equilibrium probabilities of identity by descent**

Vector gathering all the probabilities of identity coefficients needed for the diploid genetic system:

$$\begin{aligned} \text{Solve} \left[ \left\{ \mathbf{Q}_{J,ff} = \right. \right. \\ \frac{1}{4} \left( \frac{1}{n} \frac{(1+F)}{2} + \left(1 - \frac{1}{n}\right) (1-m)^2 \mathbf{Q}_{J,ff} \right) + \frac{1}{2} (1-m)^2 \mathbf{Q}_{J,fm} + \frac{1}{4} \left( \frac{1}{n} \frac{(1+F)}{2} + \left(1 - \frac{1}{n}\right) (1-m)^2 \mathbf{Q}_{J,mm} \right), \\ \mathbf{Q}_{J,fm} = \frac{1}{4} \left( \frac{1}{n} \frac{(1+F)}{2} + \left(1 - \frac{1}{n}\right) (1-m)^2 \mathbf{Q}_{J,ff} \right) + \frac{1}{2} (1-m)^2 \mathbf{Q}_{J,fm} + \\ \frac{1}{4} \left( \frac{1}{n} \frac{(1+F)}{2} + \left(1 - \frac{1}{n}\right) (1-m)^2 \mathbf{Q}_{J,mm} \right), \mathbf{Q}_{J,mm} = \\ \frac{1}{4} \left( \frac{1}{n} \frac{(1+F)}{2} + \left(1 - \frac{1}{n}\right) (1-m)^2 \mathbf{Q}_{J,ff} \right) + \frac{1}{2} (1-m)^2 \mathbf{Q}_{J,fm} + \frac{1}{4} \left( \frac{1}{n} \frac{(1+F)}{2} + \left(1 - \frac{1}{n}\right) (1-m)^2 \mathbf{Q}_{J,mm} \right), \\ \left. \left. \mathbf{F} = (1-m)^2 \mathbf{Q}_{J,fm} \right\}, \left\{ \mathbf{Q}_{J,ff}, \mathbf{Q}_{J,fm}, \mathbf{Q}_{J,mm}, \mathbf{F} \right\} \right]; \end{aligned}$$

$$\begin{aligned} \text{vecQDiplo} = \text{Flatten} \left[ \left\{ \left\{ \mathbf{Q}_f \rightarrow \frac{(1+F)}{2}, \mathbf{Q}_m \rightarrow \frac{(1+F)}{2}, \mathbf{Q}_{ff} \rightarrow (1-m)^2 \mathbf{Q}_{J,ff}, \mathbf{Q}_{fm} \rightarrow (1-m)^2 \mathbf{Q}_{J,fm}, \right. \right. \right. \\ \left. \left. \mathbf{Q}_{mm} \rightarrow (1-m)^2 \mathbf{Q}_{J,mm}, \mathbf{Q}_{R,ff} \rightarrow \frac{1}{n} \frac{(1+F)}{2} + \left( \frac{n-1}{n} \right) (1-m)^2 \mathbf{Q}_{J,ff} \right\} /. \%, \% \right] // \text{FullSimplify} \end{aligned}$$

$$\begin{aligned} \left\{ \mathbf{Q}_f \rightarrow \frac{-1 + (-2+m)m(-1+2n)}{-1 + (-2+m)m(-1+4n)}, \mathbf{Q}_m \rightarrow \frac{-1 + (-2+m)m(-1+2n)}{-1 + (-2+m)m(-1+4n)}, \mathbf{Q}_{ff} \rightarrow -\frac{(-1+m)^2}{-1 + (-2+m)m(-1+4n)}, \right. \\ \mathbf{Q}_{fm} \rightarrow -\frac{(-1+m)^2}{-1 + (-2+m)m(-1+4n)}, \mathbf{Q}_{mm} \rightarrow -\frac{(-1+m)^2}{-1 + (-2+m)m(-1+4n)}, \mathbf{Q}_{R,ff} \rightarrow \frac{-1 + (-2+m)m}{-1 + (-2+m)m(-1+4n)}, \\ \mathbf{Q}_{J,ff} \rightarrow -\frac{1}{-1 + (-2+m)m(-1+4n)}, \mathbf{Q}_{J,mm} \rightarrow -\frac{1}{-1 + (-2+m)m(-1+4n)}, \\ \left. \mathbf{Q}_{J,fm} \rightarrow -\frac{1}{-1 + (-2+m)m(-1+4n)}, \mathbf{F} \rightarrow -\frac{(-1+m)^2}{-1 + (-2+m)m(-1+4n)} \right\} \end{aligned}$$

$$\left\{ \begin{aligned} Q_{\mathcal{E}} &\rightarrow \frac{-1 + (-2 + m) m (-1 + 2 n)}{-1 + (-2 + m) m (-1 + 4 n)}, Q_m \rightarrow \frac{-1 + (-2 + m) m (-1 + 2 n)}{-1 + (-2 + m) m (-1 + 4 n)}, Q_{\mathcal{E}\mathcal{E}} \rightarrow -\frac{(-1 + m)^2}{-1 + (-2 + m) m (-1 + 4 n)}, \\ Q_{\mathcal{E}m} &\rightarrow -\frac{(-1 + m)^2}{-1 + (-2 + m) m (-1 + 4 n)}, Q_{mm} \rightarrow -\frac{(-1 + m)^2}{-1 + (-2 + m) m (-1 + 4 n)}, Q_{R,\mathcal{E}\mathcal{E}} \rightarrow \frac{-1 + (-2 + m) m}{-1 + (-2 + m) m (-1 + 4 n)}, \\ Q_{J,\mathcal{E}\mathcal{E}} &\rightarrow -\frac{1}{-1 + (-2 + m) m (-1 + 4 n)}, Q_{J,mm} \rightarrow -\frac{1}{-1 + (-2 + m) m (-1 + 4 n)}, \\ Q_{J,\mathcal{E}m} &\rightarrow -\frac{1}{-1 + (-2 + m) m (-1 + 4 n)}, F \rightarrow -\frac{(-1 + m)^2}{-1 + (-2 + m) m (-1 + 4 n)} \end{aligned} \right\}$$

$$\left\{ \begin{aligned} Q_{\mathcal{F}} &\rightarrow \frac{-1 + (-2 + m) m (-1 + 2 n)}{-1 + (-2 + m) m (-1 + 4 n)}, Q_m \rightarrow \frac{-1 + (-2 + m) m (-1 + 2 n)}{-1 + (-2 + m) m (-1 + 4 n)}, Q_{\mathcal{F}\mathcal{F}} \rightarrow -\frac{(-1 + m)^2}{-1 + (-2 + m) m (-1 + 4 n)}, \\ Q_{\mathcal{F}m} &\rightarrow -\frac{(-1 + m)^2}{-1 + (-2 + m) m (-1 + 4 n)}, Q_{mm} \rightarrow -\frac{(-1 + m)^2}{-1 + (-2 + m) m (-1 + 4 n)}, Q_{R,\mathcal{F}\mathcal{F}} \rightarrow \frac{-1 + (-2 + m) m}{-1 + (-2 + m) m (-1 + 4 n)}, \\ Q_{J,\mathcal{F}\mathcal{F}} &\rightarrow -\frac{1}{-1 + (-2 + m) m (-1 + 4 n)}, Q_{J,mm} \rightarrow -\frac{1}{-1 + (-2 + m) m (-1 + 4 n)}, \\ Q_{J,\mathcal{F}m} &\rightarrow -\frac{1}{-1 + (-2 + m) m (-1 + 4 n)}, F \rightarrow -\frac{(-1 + m)^2}{-1 + (-2 + m) m (-1 + 4 n)} \end{aligned} \right\}$$

Vector gathering all the probabilities of identity coefficients needed for the haplo-diploid genetic system:

$$\begin{aligned} \text{Solve} [ & \\ \{ Q_{J,\mathcal{E}\mathcal{E}} &== \frac{1}{4} \left( \frac{1}{n} \frac{(1+F)}{2} + \left( 1 - \frac{1}{n} \right) (1-m)^2 Q_{J,\mathcal{E}\mathcal{E}} \right) + \frac{1}{2} (1-m)^2 Q_{J,\mathcal{E}m} + \frac{1}{4} \left( \frac{1}{n} + \left( 1 - \frac{1}{n} \right) (1-m)^2 Q_{J,mm} \right), \\ Q_{J,\mathcal{E}m} &== \frac{1}{2} \left( \frac{1}{n} \frac{(1+F)}{2} + \left( 1 - \frac{1}{n} \right) (1-m)^2 Q_{J,\mathcal{E}\mathcal{E}} \right) + \frac{1}{2} (1-m)^2 Q_{J,\mathcal{E}m}, \\ Q_{J,mm} &== \frac{1}{n} \frac{(1+F)}{2} + \left( 1 - \frac{1}{n} \right) (1-m)^2 Q_{J,\mathcal{E}\mathcal{E}}, \\ F &== (1-m)^2 Q_{J,\mathcal{E}m} \}, \{ Q_{J,\mathcal{E}\mathcal{E}}, Q_{J,\mathcal{E}m}, Q_{J,mm}, F \} ]; \end{aligned}$$

**vecQHaploDiplo =**

$$\text{Flatten}\left[\left\{\left\{Q_f \rightarrow \frac{(1+F)}{2}, Q_m \rightarrow 1, Q_{ff} \rightarrow (1-m)^2 Q_{J,ff}, Q_{fm} \rightarrow (1-m)^2 Q_{J,fm}, Q_{mm} \rightarrow (1-m)^2 Q_{J,mm},\right.\right.\right. \\ \left.\left.\left. Q_{R,ff} \rightarrow \frac{1}{n} \frac{(1+F)}{2} + \left(\frac{n-1}{n}\right) (1-m)^2 Q_{J,ff}\right\} /. \%, \%\right\} // \text{FullSimplify}$$

$$\left\{Q_f \rightarrow \frac{1}{2} \left(1 + \frac{(-1+m)^2}{1 + (-2+m)m((-2+m)m(-1+n) - 3n)}\right), Q_m \rightarrow 1,\right. \\ Q_{ff} \rightarrow -\frac{(-1+m)^2(-2+(-2+m)m)}{2(1+(-2+m)m((-2+m)m(-1+n) - 3n))}, Q_{fm} \rightarrow \frac{(-1+m)^2}{1+(-2+m)m((-2+m)m(-1+n) - 3n)}, \\ Q_{mm} \rightarrow -\frac{(-1+m)^2(-1+(-2+m)m)}{1+(-2+m)m((-2+m)m(-1+n) - 3n)}, Q_{R,ff} \rightarrow \frac{1-(-2+m)m}{1+(-2+m)m((-2+m)m(-1+n) - 3n)}, \\ Q_{J,mm} \rightarrow \frac{1-(-2+m)m}{1+(-2+m)m((-2+m)m(-1+n) - 3n)}, Q_{J,ff} \rightarrow \frac{2-(-2+m)m}{2(1+(-2+m)m((-2+m)m(-1+n) - 3n))}, \\ \left. Q_{J,fm} \rightarrow \frac{1}{1+(-2+m)m((-2+m)m(-1+n) - 3n)}, F \rightarrow \frac{(-1+m)^2}{1+(-2+m)m((-2+m)m(-1+n) - 3n)}\right\}$$

### Check of equation (4) of the main text (maternal control of the trait)

Inclusive fitness effect (S) obtained by summing up the components listed in Table 2 of the main text:

$$\mathbf{S} := \left\{-\mathbf{C}, \mathbf{C}(1-m)^2, \mathbf{B}(1-(1-m)^2)\right\} \cdot \left\{v_f(t_{ff} Q_f + t_{fm} Q_{fm}) + v_m(t_{mf} Q_f + t_{mm} Q_{fm}),\right. \\ \left.v_f(t_{ff} Q_{R,ff} + t_{fm} Q_{fm}) + v_m(t_{mf} Q_{R,ff} + t_{mm} Q_{fm}), v_f(t_{ff} Q_{ff} + t_{fm} Q_{fm}) + v_m(t_{mf} Q_{ff} + t_{mm} Q_{fm})\right\}$$

Threshold cost to benefit ratio for the diploid genetic system:

$$\mathbf{S} /. \left\{v_f \rightarrow \frac{1}{2}, v_m \rightarrow \frac{1}{2}, t_{ff} \rightarrow \frac{1}{2}, t_{fm} \rightarrow \frac{1}{2}, t_{mf} \rightarrow \frac{1}{2}, t_{mm} \rightarrow \frac{1}{2}\right\} /. \text{vecQDiplo};$$

**C /. Extract[Solve[% == 0 /. B → 1, C], {1}];**

$$\text{Simplify}\left[\% == \frac{(1-m)^2}{n}\right]$$

True

Threshold cost to benefit ratio for the haplo-diploid genetic system:

$$\mathbf{S} /. \left\{v_f \rightarrow \frac{2}{3}, v_m \rightarrow \frac{1}{3}, t_{ff} \rightarrow \frac{1}{2}, t_{fm} \rightarrow \frac{1}{2}, t_{mf} \rightarrow 1, t_{mm} \rightarrow 0\right\} /. \text{vecQHaploDiplo};$$

**C /. Extract[Solve[% == 0 /. B → 1, C], {1}];**

```
Simplify[% ==  $\frac{(1 - m)^2}{n}$ ]
```

True

### Check of equation (5) of the main text (offspring control of the trait)

---

Inclusive fitness effect (S) obtained by summing up the components listed in Table 3 of the main text:

```
S := {-C, C (1 - m)^2, B (1 - (1 - m)^2)}.
{v_f (t_ff Q_f + t_fm Q_f) + v_m (t_mf Q_m + t_mm Q_m), v_f (t_ff Q_J,ff + t_fm Q_J,ff) + v_m (t_mf Q_J,mm + t_mm Q_J,mm),
v_f (t_ff (x Q_ff + (1 - x) Q_fm) + t_fm (x Q_fm + (1 - x) Q_mm)) +
v_m (t_mf (x Q_ff + (1 - x) Q_fm) + t_mm (x Q_fm + (1 - x) Q_mm))}
```

Threshold cost to benefit ratio for the diploid genetic system:

```
S /. {v_f -> 1/2, v_m -> 1/2, t_ff -> 1/2, t_fm -> 1/2, t_mf -> 1/2, t_mm -> 1/2} /. vecQDiplo;
```

```
C /. Extract[Solve[% == 0 /. B -> 1, C], {1}];
```

```
Simplify[% ==  $\frac{(1 - m)^2}{2 n}$ ]
```

True

Threshold cost to benefit ratio for the haplo-diploid genetic system:

```
S /. {v_f -> 2/3, v_m -> 1/3, t_ff -> 1/2, t_fm -> 1/2, t_mf -> 1, t_mm -> 0} /. vecQHaploDiplo;
```

```
C /. Extract[Solve[% == 0 /. B -> 1, C], {1}];
```

```
Simplify[% ==  $\frac{(1 - m)^2}{2 n}$ ]
```

True
